# Supplementary material
Source: publisher figshare collection journal article supplement (https://acs.figshare.com/ndownloader/files/3901711)
Supplement: Supplementary file 1 [file 3901711]

**Supporting Information for:**

# Wide Bandgap III-Nitride Nanomembrane for Optoelectronic Applications

*Sung Hyun Park<sup>†</sup>, Ge Yuan<sup>†</sup>, Danti Chen<sup>†</sup>, Kanglin Xiong<sup>†</sup>, Jie Song<sup>†</sup>, Benjamin Leung<sup>†</sup>, and  
Jung Han<sup>\*, †</sup>*

<sup>†</sup>Department of Electrical Engineering, Yale University, New Haven, Connecticut 06520, USA

Corresponding Author: \* Jung.han@yale.edu

## **Nanomembrane epitaxial structure and hydrofluoric acid based electrochemical etching**

The metalorganic chemical vapor deposition (MOCVD) growth on sapphire begin with 1- $\mu\text{m}$ -thick undoped GaN using a standard two-step growth<sup>1</sup> followed by moderately n-doped layer (Si concentration of  $5 \times 10^{18} \text{ cm}^{-3}$ , 500 nm in thickness) to ensure uniform distribution of the anodization bias across the sample. This n-type layer is protected from electrochemical (EC) etching by another undoped GaN with thickness of 500 nm above which the sacrificial layer is grown with a Si doping concentration of  $1.2 \times 10^{19} \text{ cm}^{-3}$  (200 nm in thickness). A thin layer of highly doped n-type GaN Si concentration of  $4.8 \times 10^{19} \text{ cm}^{-3}$ , 10 nm in thickness) was inserted at

both the top and bottom of sacrificial layer to enhance the contrast in conductivity.

Photolithography followed by chlorine-based reactive ion etching (ICP-RIE, Oxford Plasmalab 100) is used to open via windows with a depth that reaches the sacrificial layer to expose the sidewalls of heavily doped n-type GaN. Photoresist (Shipley Microposit S1827) is used as a mask for chlorine-based reactive ion etching.

EC etching of GaN nanomembrane (NM) structures is conducted in a two-electrode cell at room temperature with NM including n-type GaN as the anode and a platinum wire as the counter electrode (cathode).<sup>2</sup> The electrolytes are prepared by adding glycerol and ethanol to hydrofluoric acid (HF, 49 %) with a volume ratio of 3 (glycerol) : 2 (ethanol) : 1 (HF). The ethanol is added to the electrolyte to increase the electrolyte wettability. The partial substitution of ethanol with glycerol is found useful in further improving the smoothness after EC etching.<sup>3</sup> The anodization process is carried out in a potentiostatic (constant voltage) mode controlled by a Keithley 2400 source meter, while etching current is recorded. The parameters of lateral HF EC etching have been explored previously.<sup>4</sup>

[1] Han, J.; Ng, T.-B.; Biefeld, R. M.; Crawford, M. H.; Follstaedt, D. M. *Appl. Phys. Lett.* **1997**, 71, 3114.

[2] Zhang, Y.; Ryu, S.-W.; Yerino, C.; Leung, B.; Sun, Q.; Song, Q.; Cao, H.; Han, J. *physica status solidi (b)* **2010**, 247, 1713.

[3] Ferrero, M. C.; Lequien, S.; Milita, S.; Parisini, A.; Romestain, R.; Sama, S.; Setzu, S.; Thiaudie`re, D. *Solid State Commun.* **2011**, 118, 85.

[4] Chen, D.; Xiao, H.; Han, J. *J. Appl. Phys.* **2012**, 112, 064303.
